# Supplementary material
Source: Springer Nature journal article supplement (https://www.springermedizin.de/resource/supplementary/12885_2009_2030_MOESM3_ESM.pdf/9460354)

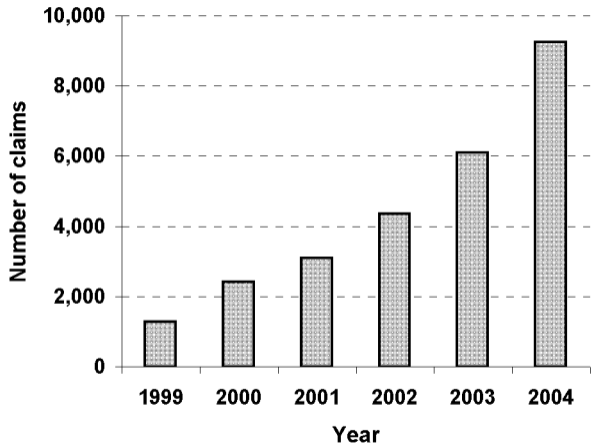

Supplement: MOESM3 [file 9460354]
